# Supplementary material for: Metacognitive problem solving: exploration of students’ perspectives through the lens of multi-dimensional engagement
Source: Royal Society of Chemistry journal article supplement (doi:10.1039/d4rp00096j), 2024-08-19
Supplement: d4rp00096j1.pdf [file d4rp00096j1.pdf]

## Electronic Supplementary Information

for the manuscript:

### **Metacognitive problem solving: Exploration of students' perspectives through the lens of multi-dimensional engagement**

Kimberly Vo<sup>a</sup>, Mahbub Sarkar<sup>b</sup>, Paul J. White<sup>a</sup>, Elizabeth Yuriev<sup>a,\*</sup>

<sup>a</sup>Faculty of Pharmacy and Pharmaceutical Sciences, Monash University, Parkville VIC 3052, Australia

<sup>b</sup>Faculty of Medicine, Nursing and Health Sciences, Monash University, Clayton VIC 3800, Australia

\* Correspondence: Tel: Int +61 3 9903 9611, E-mail: [elizabeth.yuriev@monash.edu](mailto:elizabeth.yuriev@monash.edu)

Contents: Thematic analysis codebook

| <b>Theme</b>                                                             | <b>Description</b>                                                                                                                                                         |
|--------------------------------------------------------------------------|----------------------------------------------------------------------------------------------------------------------------------------------------------------------------|
| <b>Theme 1: Engagement with structured problem solving</b>               |                                                                                                                                                                            |
| <i><b>Cognitive sub-themes</b></i>                                       |                                                                                                                                                                            |
| Assessed quality and depth of solution                                   | Students evaluated the accuracy and comprehensiveness of their problem-solving attempt.                                                                                    |
| Identified cognitive processes to use in the future                      | Students recognised and noted the mental strategies employed during problem-solving tasks for potential application in future challenges.                                  |
| Identified flaws in solution                                             | Students pinpointed errors or weaknesses within their solution that were problem-specific or related to their problem-solving process.                                     |
| Recognised progress in problem-solving skills                            | Students acknowledged improvements or advancements in their ability to tackle and resolve chemical problems.                                                               |
| Identified specific mistake that led to the wrong answer                 | Students identified and highlighted particular errors or misconceptions that resulted in incorrect solutions.                                                              |
| Identified strategies for future improvements                            | Students devised plans or techniques to enhance their problem-solving proficiency in subsequent problems.                                                                  |
| Identified benefits of using the scaffold                                | Students recognised advantages such as clearer communication, a methodical approach, and a helpful starting point facilitated by the problem-solving scaffold.             |
| <i><b>Emotional sub-themes</b></i>                                       |                                                                                                                                                                            |
| Felt confident                                                           | Students reflected on experiencing a sense of assurance or self-belief in their ability to effectively utilise the problem-solving scaffold.                               |
| Felt positive about their performance                                    | Students commented on maintaining a positive outlook regarding their problem-solving efforts and outcomes while utilising the scaffold.                                    |
| Helps to deal with stress                                                | Students noted that engaging with problem-solving scaffold aided in managing feelings of stress or pressure associated with solving chemical problems.                     |
| <i><b>Behavioural sub-themes</b></i>                                     |                                                                                                                                                                            |
| Demonstrated problem-solving elements                                    | Students commented on effectively demonstrating problem-solving elements during chemical problem-solving activity.                                                         |
| Evaluated their work                                                     | Students noted that they actively assessed or reviewed their problem-solving efforts and outcomes.                                                                         |
| Slowed down problem-solving process for deliberate and methodical action | Students reflected on deliberately pacing their problem-solving approach, ensuring careful and systematic consideration of each step while utilising the scaffold.         |
| Used expert solution as a checklist to confirm correctness               | Students stated that they used expert-provided solutions as a reference or guide to validate the correctness and depth of their own problem-solving processes or outcomes. |

| <b>Theme 2: Non-engagement (disaffection) with structured problem solving</b> |                                                                                                                                                                |
|-------------------------------------------------------------------------------|----------------------------------------------------------------------------------------------------------------------------------------------------------------|
| <b><i>Cognitive sub-themes</i></b>                                            |                                                                                                                                                                |
| Cognitive challenge                                                           | Students noted encountering difficulties or complexities in utilising the problem-solving scaffold effectively.                                                |
| Struggled to use the scaffold                                                 | Students commented on facing obstacles in employing the problem-solving scaffold during chemical problem-solving activities.                                   |
| Unfamiliar with the scaffold                                                  | Students reflected on a lack prior knowledge or experience with the problem-solving scaffold, which deterred students from engaging with the scaffold.         |
| Surface level use of the scaffold                                             | Students stated using the problem-solving scaffold in a superficial or cursory manner, without delving deeply into its potential benefits.                     |
| Own preferred or established method                                           | Students noted opting to rely on personal or familiar problem-solving techniques rather than utilising the provided scaffold.                                  |
| Scaffold use was not necessary                                                | Students reflected on perceiving the problem-solving scaffold as not essential to solving the problem.                                                         |
| Structured problem-solving was assumed knowledge                              | Students presumed structured problem-solving techniques were a given which resulted in students not explicitly demonstrating problem-solving processes.        |
| Scaffold use required extra time and/or effort                                | Students stated that employing the problem-solving scaffold demanded additional time or exertion compared to their usual problem-solving methods.              |
| Did not want to make mistakes                                                 | Students reflected on a reluctance to encounter errors or faults during their problem-solving attempt, which impacted their engagement with the scaffold.      |
| <b><i>Emotional sub-themes</i></b>                                            |                                                                                                                                                                |
| Lack of self-confidence                                                       | Students noted experiencing a deficiency in self-belief in their ability to navigate chemical problem-solving tasks with the scaffold.                         |
| Felt stressed                                                                 | Students reflected on feelings of unease during problem-solving activities, which can impact their level of engagement with the scaffold.                      |
| Felt over-critical of their performance                                       | Students stated exhibiting a tendency to excessively scrutinise or judge their problem-solving performance once exposed to the expert solution.                |
| <b><i>Behavioural sub-themes</i></b>                                          |                                                                                                                                                                |
| Skipped problem-solving steps                                                 | Students reflected on omitting certain steps within the problem-solving process.                                                                               |
| Completed problem-solving steps but did not show them                         | Students commented on executing all required problem-solving steps but failed to demonstrate or document their completion while utilising the scaffold.        |
| Forgot                                                                        | Students noted struggling to remember to use the scaffold, potentially leading to oversight or omission of crucial problem-solving steps with the scaffold.    |
| Rushed problem-solving                                                        | Students acknowledged hastily approaching problem-solving tasks that potentially led to sacrificing thoroughness or accuracy in their problem-solving efforts. |
